# Supplementary material for: Epidemiological analysis of the Eyam plague outbreak of 1665–1666
Source: PubMed Central journal article supplement (PMC4874723; doi:10.1098/rspb.2016.0618), 2016-05-11
Supplement: rspb20160618supp2.pdf [file rspb20160618supp2.pdf]

SEE SEPARATE EXCEL FILE

**Table S1.** Data used in this study

| Augmented data      |                                                                                    |                                                                  |
|---------------------|------------------------------------------------------------------------------------|------------------------------------------------------------------|
| $\mathcal{A}$       | Description                                                                        |                                                                  |
| $\phi_{h,i}$        | time of infection for $i$ in $h$                                                   |                                                                  |
| $\nu_{h,i}$         | time of becoming infectious for $i$ in $h$                                         |                                                                  |
| $\psi_{h,i}$        | time of death (observed) for $i$ in $h$                                            |                                                                  |
| Model parameters    |                                                                                    |                                                                  |
| $\Theta$            | Description                                                                        |                                                                  |
| $\frac{\beta_H}{N}$ | additional human-to-human transmission rate within household (per person, per day) |                                                                  |
| $\frac{\beta_V}{N}$ | human-to-human transmission rate within village (per person, per day)              |                                                                  |
| $\beta_R$           | rodent-to-human transmission rate                                                  |                                                                  |
| $\alpha$            | rate of becoming infectious (per day)                                              |                                                                  |
| $\gamma$            | rate of death from plague (per day)                                                |                                                                  |
| Calculated items    |                                                                                    |                                                                  |
|                     | Description                                                                        | Formula                                                          |
| $f_{h,i}$           | length of infection period for $i$ in $h$                                          | $\psi_{h,i} - \phi_{h,i}$                                        |
| $p_{h,i}$           | length of infectious period for $i$ in $h$                                         | $\psi_{h,i} - \nu_{h,i}$                                         |
| $S_h(t)$            | number susceptible at $t$ in $h$                                                   | $\sum_{i=1}^{N_h} 1_{\{\phi_{h,i} > t\}}$                        |
| $E_h(t)$            | number latently infected at $t$ in $h$                                             | $\sum_{i=1}^{N_h} 1_{\{\phi_{h,i} \leq t < \nu_{h,i}\}}$         |
| $I_h(t)$            | number infectious at $t$ in $h$                                                    | $\sum_{i=1}^{N_h} 1_{\{\nu_{h,i} \leq t < \psi_{h,i}\}}$         |
| $R_h(t)$            | number deceased at $t$ in $h$                                                      | $\sum_{i=1}^{N_h} 1_{\{\psi_{h,i} \leq t\}}$                     |
| $\lambda_{I,h}(t)$  | instantaneous rate of infection at $t$ in $h$                                      | $\frac{1}{N} [(\beta_H I_h(t) + \beta_V I(t)) + \beta_R] S_h(t)$ |
| $\lambda_{E,h}(t)$  | rate of becoming infectious at $t$ in $h$                                          | $\alpha E_h(t)$                                                  |
| $\lambda_{D,h}(t)$  | rate of death from plague at $t$ in $h$                                            | $\gamma I_h(t)$                                                  |

**Table S2.** Notation used in the model description for individuals  $i = 1, \dots, N_h$  in households  $h = 1, \dots, M$  at time  $t$

|               | Parameter       | Prior distribution | Proposal distribution          | $\sigma$  | Min               | Max             |
|---------------|-----------------|--------------------|--------------------------------|-----------|-------------------|-----------------|
| $\Theta$      | $\beta_H^{(k)}$ | $U[0, 100)$        | $N(\beta_H^{(k-1)}, \sigma^2)$ | 5         | 0                 | 100             |
|               | $\beta_V^{(k)}$ | $U[0, 100)$        | $N(\beta_V^{(k-1)}, \sigma^2)$ | 0.5       | 0                 | 100             |
|               | $\beta_R^{(k)}$ | $U[0, 100)$        | $N(\beta_R^{(k-1)}, \sigma^2)$ | $10^{-4}$ | 0                 | 100             |
|               | $\alpha^{(k)}$  | $U[0, 100)$        | $N(\alpha^{(k-1)}, \sigma^2)$  | 0.3       | 0                 | 100             |
|               | $\gamma^{(k)}$  | $U[0, 100)$        | $N(\gamma^{(k-1)}, \sigma^2)$  | 0.5       | 0                 | 100             |
| $\mathcal{A}$ | $f_{h,i}^{(k)}$ | n/a                | $N(f_{h,i}^{(k-1)}, \sigma^2)$ | 5         | $p_{h,i}^{(k-1)}$ | 30              |
|               | $p_{h,i}^{(k)}$ | n/a                | $N(p_{h,i}^{(k-1)}, \sigma^2)$ | 5         | 0                 | $f_{h,i}^{(k)}$ |

**Table S3.** Prior and proposal distributions for parameters and augmented data at iteration  $k$  for persons  $i = 1, \dots, N_h$  in households  $h = 1, \dots, M$  at time  $t$

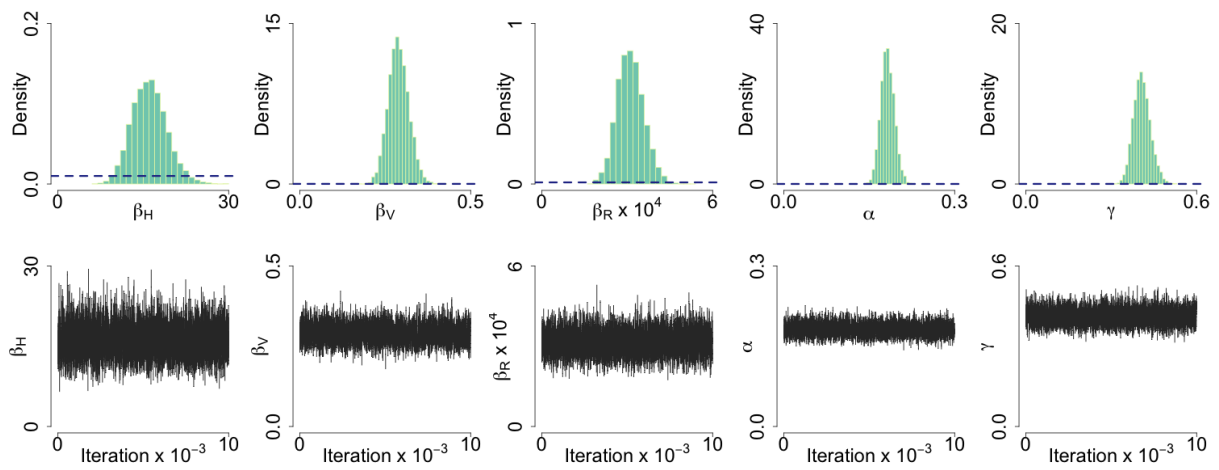

**Figure S1.** The top row shows histograms of posterior parameter values under our model. Blue dashed lines show the prior density. The bottom row shows MCMC trace plots of the parameter values.

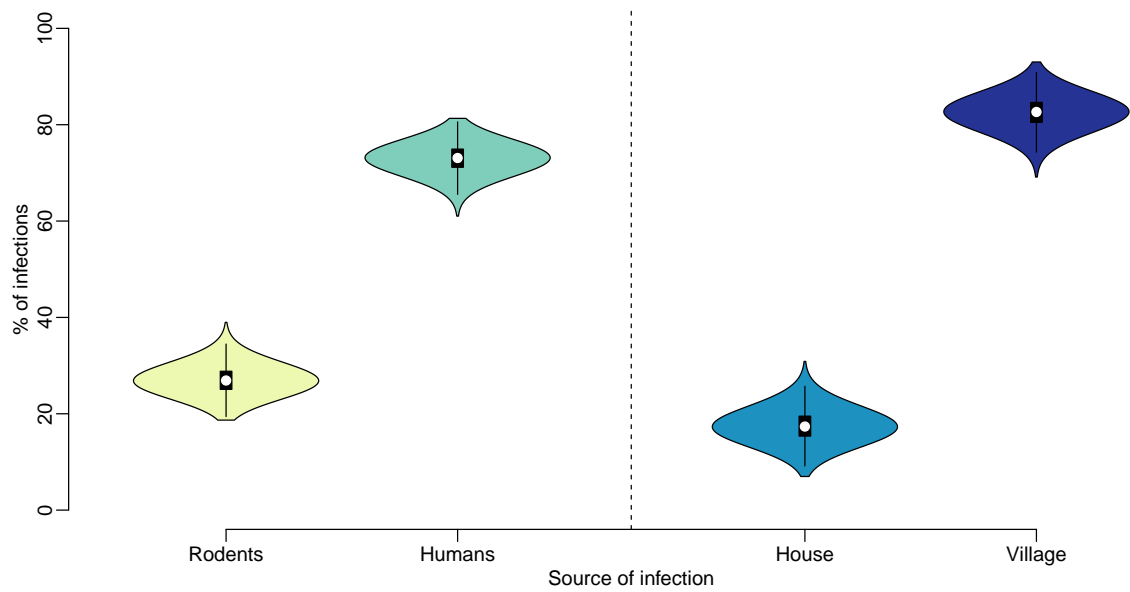

**Figure S2.** Left: expected proportion of total infections caused by contact with rodents vs. humans. Right: Expected proportion of human-to-human infections caught within household vs. in village.

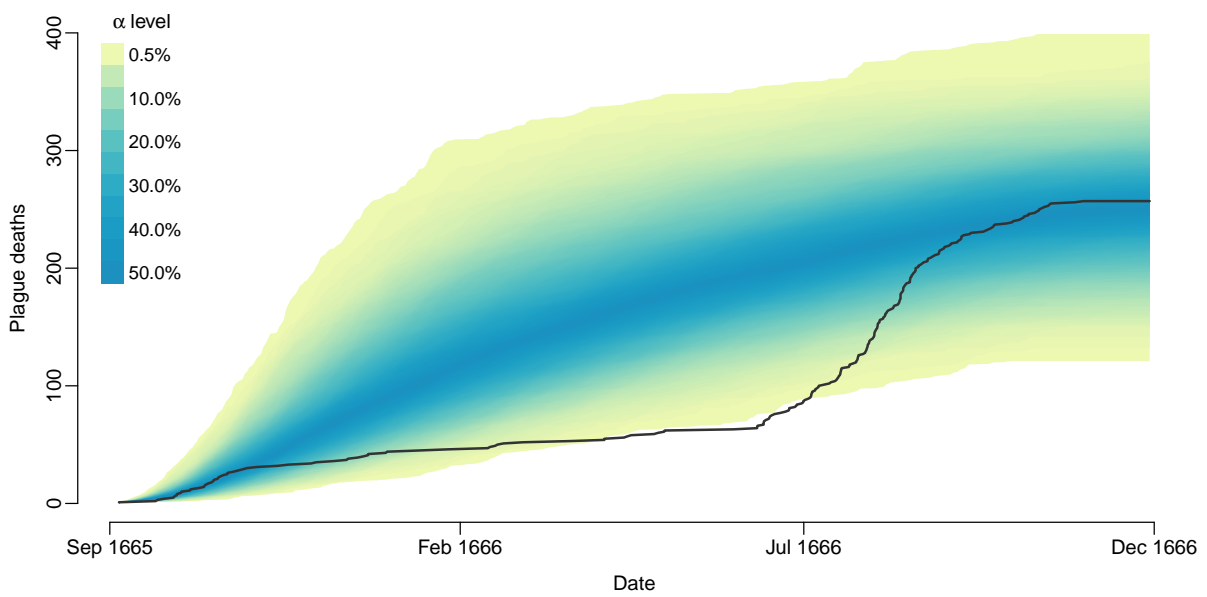

**Figure S3.** Comparison of simulated and observed deaths in Eyam due to plague. The dotted line represents observed deaths, and the shaded area the 99.5% posterior predictive interval from a thousand simulated epidemics using parameters drawn from their posterior distributions.
